# Supplementary material
Source: Springer Nature journal article supplement (https://www.springermedizin.de/resource/supplementary/12916_2012_622_MOESM7_ESM.pdf/9597924)
Supplement: MOESM7 [file 9597924]

| STUDY                        | Prospective longitudinal studies<br>Risk of smoking and ND (Table 1) | Prospective longitudinal studies -<br>Risk of anxiety disorders (Table 2) | Quasi - Prospective longitudinal studies -<br>Risk of smoking and ND (Table 3) | Quasi - Prospective longitudinal studies -<br>Risk of anxiety disorders (Table 4) | Cross sectional associations (Table 5) |
|------------------------------|----------------------------------------------------------------------|---------------------------------------------------------------------------|--------------------------------------------------------------------------------|-----------------------------------------------------------------------------------|----------------------------------------|
| Acierno et al 1996 [40]      |                                                                      |                                                                           |                                                                                |                                                                                   | +                                      |
| Acierno et al, 2000 [39]     |                                                                      |                                                                           |                                                                                |                                                                                   | +                                      |
| Breslau et al, 1991 [42]     |                                                                      |                                                                           |                                                                                |                                                                                   | +                                      |
| Breslau 1995 [41]            |                                                                      |                                                                           |                                                                                |                                                                                   | +                                      |
| Breslau et al, 1999 [19]     |                                                                      | +0                                                                        | 0                                                                              | +0                                                                                | +                                      |
| Breslau et al, 2003[21]      | +                                                                    |                                                                           |                                                                                |                                                                                   |                                        |
| Breslau et al , 2004 [38]    |                                                                      |                                                                           |                                                                                | +0                                                                                |                                        |
| Breslau et al, 2004 [35]     |                                                                      |                                                                           | +0                                                                             |                                                                                   |                                        |
| Brown et al, 1996 [17]       | 0                                                                    |                                                                           |                                                                                |                                                                                   | 0                                      |
| Carroll et al, 2009 [43]     |                                                                      |                                                                           |                                                                                |                                                                                   | +                                      |
| Chou et al, 2011 [30]        | 0                                                                    | 0                                                                         |                                                                                |                                                                                   |                                        |
| Costello et al, 1999 [37]    |                                                                      |                                                                           | +                                                                              |                                                                                   | +                                      |
| Cougle et al, 2010 [44]      |                                                                      |                                                                           |                                                                                |                                                                                   | +                                      |
| Cuijpers et al, 2007 [32]    | +                                                                    | 0                                                                         |                                                                                |                                                                                   | +                                      |
| Degenhardt et al, 2001 [45]  |                                                                      |                                                                           |                                                                                |                                                                                   | +                                      |
| Dierker et al, 2007 [47]     |                                                                      |                                                                           |                                                                                |                                                                                   | +0                                     |
| Dierker et al, 2008 [46]     |                                                                      |                                                                           |                                                                                |                                                                                   | +0                                     |
| Durai et al 2011 [48]        |                                                                      |                                                                           |                                                                                |                                                                                   | +                                      |
| Farrell et al, 2003 [49]     |                                                                      |                                                                           |                                                                                |                                                                                   | +                                      |
| Glassman et al, 1990 [50]    |                                                                      |                                                                           |                                                                                |                                                                                   | 0                                      |
| Goodwin et al, 2005 [18]     | 0                                                                    | 0                                                                         |                                                                                |                                                                                   |                                        |
| Grabe et al, 2001 [51]       |                                                                      |                                                                           |                                                                                |                                                                                   | +                                      |
| Grant et al, 2004 [52]       |                                                                      |                                                                           |                                                                                |                                                                                   | +                                      |
| Grant et al, 2005 [53]       |                                                                      |                                                                           |                                                                                |                                                                                   | +                                      |
| Gwynn et al, 2008 [54]       |                                                                      |                                                                           |                                                                                |                                                                                   | +                                      |
| Hapke et al, 2005 [55]       |                                                                      |                                                                           |                                                                                |                                                                                   | +                                      |
| Isensee et al, 2003 [27]     | 0                                                                    | 0                                                                         |                                                                                |                                                                                   | +0                                     |
| John et al, 2004 [56]        |                                                                      |                                                                           |                                                                                |                                                                                   | +                                      |
| Johnson et al, 2000 [22]     | 0                                                                    | +                                                                         |                                                                                |                                                                                   |                                        |
| Johnson et al, 2009 [33]     | -0                                                                   |                                                                           |                                                                                |                                                                                   |                                        |
| Kandel et al, 1997 [58]      |                                                                      |                                                                           |                                                                                |                                                                                   | +                                      |
| Kandel et al, 2001 [57]      |                                                                      |                                                                           |                                                                                |                                                                                   | +                                      |
| Koenen et al, 2005 [36]      |                                                                      |                                                                           | +                                                                              | +                                                                                 |                                        |
| Lasser et al, 2000 [59]      |                                                                      |                                                                           |                                                                                |                                                                                   | +                                      |
| Lawrence et al, 2010 [6]     |                                                                      |                                                                           |                                                                                |                                                                                   | +                                      |
| Morris et al, 2006 [60]      |                                                                      |                                                                           |                                                                                |                                                                                   | 0                                      |
| Nelson et al, 1998 [61]      |                                                                      |                                                                           |                                                                                |                                                                                   | +                                      |
| Op Den Velde et al 2002 [62] |                                                                      |                                                                           |                                                                                |                                                                                   | +                                      |
| Schmitz et al, 2003 [63]     |                                                                      |                                                                           |                                                                                |                                                                                   | x                                      |
| Schumann et al, 2004 [64]    |                                                                      |                                                                           |                                                                                |                                                                                   | +0                                     |
| Sonntag et al, 2000 [28]     | 0                                                                    |                                                                           |                                                                                |                                                                                   | +0                                     |
| Swendsen et al, 2010 [34]    | +0                                                                   |                                                                           |                                                                                |                                                                                   |                                        |
| Tobias et al, 2008 [7]       |                                                                      |                                                                           |                                                                                |                                                                                   | x                                      |
| Vesga-Lopez, 2008 [65]       |                                                                      |                                                                           |                                                                                |                                                                                   | +0                                     |
| Wittchen et al, 1999 [66]    |                                                                      |                                                                           |                                                                                |                                                                                   | +                                      |
| Woodward et al, 2001 [29]    | +                                                                    |                                                                           |                                                                                |                                                                                   |                                        |
| Wu et al, 2010 [67]          |                                                                      |                                                                           |                                                                                |                                                                                   | +                                      |

**KEY**

|    |                                                                                |
|----|--------------------------------------------------------------------------------|
| +  | Predominantly positive associations                                            |
| +0 | Positive associations with some non-significant associations                   |
| 0  | Predominantly non-significant associations (+/- some significant associations) |
| x  | Ambiguous or no presented associations (e.g prevalence only)                   |
| -0 | Negative associations with some non-significant associations                   |
| -  | Predominantly negative associations                                            |
